# Supplementary material
Source: publisher site journal article supplement (https://www.dovepress.com/article/560168)
Supplement: Supplementary file 1 [file supplements.docx]

Table S1. Details of the efflux pump genes carried by the chromosome of the *E. coli* strain EC6622 identified by the CARD-RGI

| Families of efflux pumps | Coordinate | Orientation | gene | Drug Class |
| --- | --- | --- | --- | --- |
| RND antibiotic efflux pump | 225932..226756 | + | *gadX* | macrolide; fluoroquinolone; penicillin beta-lactam |
| 228215..231328 | - | *mdtF* | macrolide; fluoroquinolone; penicillin beta-lactam |
| 231353..232510 | - | *mdtE* | macrolide; fluoroquinolone; penicillin beta-lactam |
| 403898..404530 | - | *CRP* | macrolide; fluoroquinolone; penicillin beta-lactam |
| 457416..460520 | - | *AcrF* | fluoroquinolone; cephalosporin; penicillin beta-lactam |
| 460532..461689 | - | *AcrE* | fluoroquinolone; cephalosporin; penicillin beta-lactam |
| 462088..462750 | + | *AcrS* | fluoroquinolone; cephalosporin; glycylcycline; penicillin beta-lactam; tetracycline; rifamycin; phenicol; disinfecting agents and antiseptics |
| 1071353..1071538 | + | *rsmA* | fluoroquinolone; diaminopyrimidine; phenicol |
| 1322439..1325552 | - | *acrD* | aminoglycoside |
| 1789699..1792776 | - | *mdtC* | aminocoumarin |
| 1792777..1795899 | - | *mdtB* | aminocoumarin |
| 1795899..1797146 | - | *mdtA* | aminocoumarin |
| 2356785..2357168 | - | *marA* | fluoroquinolone; monobactam; carbapenem; cephalosporin; glycylcycline; penicillin beta-lactam; tetracycline; rifamycin; phenicol; disinfecting agents and antiseptics |
| 3505112..3506305 | + | *acrA* | fluoroquinolone; cephalosporin; glycylcycline; penicillin beta-lactam; tetracycline; rifamycin; phenicol; disinfecting agents and antiseptics |
| 3506328..3509477 | + | *acrB* | fluoroquinolone; cephalosporin; glycylcycline; penicillin beta-lactam; tetracycline; rifamycin; phenicol; disinfecting agents and antiseptics |
| 4524922..4526295 | + | *cpxA* | aminoglycoside; aminocoumarin |
| 1786164..1786886 | - | *baeR* | aminoglycoside; aminocoumarin |
| 2357188..2357622 | - | AcrAB-TolC with MarR mutations | fluoroquinolone; cephalosporin; glycylcycline; penicillin beta-lactam; tetracycline; rifamycin; phenicol; disinfecting agents and antiseptics |
| 3504323..3504970 | - | AcrAB-TolC with AcrR mutation | fluoroquinolone; cephalosporin; glycylcycline; penicillin beta-lactam; tetracycline; rifamycin; phenicol; disinfecting agents and antiseptics |
| MFS antibiotic efflux pump | 1076480..1078018 | - | *emrB* | fluoroquinolone |
| 1078035..1079207 | - | *emrA* | fluoroquinolone |
| 1079334..1079864 | - | *emrR* | fluoroquinolone |
| 1420485..1421648 | + | *emrK* | tetracycline |
| 1421648..1423186 | + | *emrY* | tetracycline |
| 2845257..2846465 | + | *mdtH* | fluoroquinolone |
| 2855096..2856322 | + | *mdtG* | phosphonic acid |
| 3085165..3086397 | - | *mdfA* | tetracycline; phenicol; disinfecting agents and antiseptics |
| 3927205..3928149 | - | *leuO* | nucleoside; disinfecting agents and antiseptics |
| 4069043..4070275 | + | *mdtM* | fluoroquinolone; lincosamide; nucleoside; phenicol; disinfecting agents and antiseptics |
| 4316041..4317072 | + | *mdtN* | nucleoside; disinfecting agents and antiseptics |
| 4317072..4319123 | + | *mdtO* | nucleoside; disinfecting agents and antiseptics |
| 4319120..4320586 | + | *mdtP* | nucleoside; disinfecting agents and antiseptics |
| ABC antibiotic efflux pump | 1612496..1614139 | + | *YojI* | peptide |
| 3001610..3003358 | - | *msbA* | nitroimidazole |
| SMR antibiotic efflux pump | 2271755..2272120 | + | KpnE | macrolide; aminoglycoside; cephalosporin; tetracycline; peptide; rifamycin; disinfecting agents and antiseptics |
| 2272107..2272436 | + | KpnF | macrolide; aminoglycoside; cephalosporin; tetracycline; peptide; rifamycin; disinfecting agents and antiseptics |
| RND antibiotic efflux pump & MFS antibiotic efflux pump | 1415857..1419450 | - | evgS | macrolide; fluoroquinolone; penicillin beta-lactam; tetracycline |
| 1419455..1420069 | - | evgA | macrolide; fluoroquinolone; penicillin beta-lactam; tetracycline |
| 2693858..2694271 | + | H-NS | macrolide; fluoroquinolone; cephalosporin; penicillin beta-lactam; tetracycline |
| RND antibiotic efflux pump & MFS antibiotic efflux pump & ABC antibiotic efflux pump | 4341651..4342115 | - | soxR with mutation | fluoroquinolone; cephalosporin; glycylcycline; penicillin beta-lactam; tetracycline; rifamycin; phenicol; disinfecting agents and antiseptics |
| 4342201..4342524 | + | soxS with mutation | fluoroquinolone; monobactam; carbapenem; cephalosporin; glycylcycline; penicillin beta-lactam; tetracycline; rifamycin; phenicol; disinfecting agents and antiseptics |

Table S2. Details of the virulence genes carried by the chromosome and plasmid pEC6622-2 of the *E. coli* strain EC6622 identified by the using ABRicate program in the VFDB database

| Sequence | VF gene | Coordinate | Coverage (%) | Identity (%) |  |
| --- | --- | --- | --- | --- | --- |
| chromosome | *gspC* | 775804..776634 | 100 | 95.07 | general secretion pathway protein C |
| *gspD* | 776874..778724 | 100 | 97.35 | general secretion pathway protein D |
| *gspE* | 778724..780217 | 100 | 96.25 | general secretion pathway protein E |
| *gspF* | 780217..781416 | 100 | 96.33 | general secretion pathway protein F |
| *gspG* | 781457..781912 | 100 | 95.61 | general secretion pathway protein G |
| *gspH* | 781949..782479 | 100 | 95.86 | general secretion pathway protein H |
| *gspI* | 782476..782847 | 100 | 95.16 | general secretion pathway protein I |
| *gspJ* | 782880..783449 | 100 | 96.49 | general secretion pathway protein J |
| *gspK* | 783446..784423 | 100 | 96.11 | general secretion pathway protein K |
| *gspL* | 784738..785598 | 100 | 97.56 | general secretion pathway protein L |
| *gspM* | 785714..786136 | 100 | 94.09 | general secretion pathway protein M |
| *espL1* | 2140365..2142263 | 100 | 94.79 | Type III secretion system effector espL1 |
| *espR1* | 2434717..2435772 | 83.81 | 94.13 | Type III secretion system effector espR1 |
| *csgB* | 2866179..2866634 | 99.78 | 83.81 | minor curlin subunit precursor curli nucleator protein CsgB |
| *csgD* | 2867388..2868038 | 100 | 81.11 | DNA-binding transcriptional regulator CsgD |
| *csgF* | 2868457..2868873 | 99.04 | 81.23 | curli production assembly/transport protein CsgF |
| *csgG* | 2868900..2869733 | 100 | 83.09 | curli production assembly/transport protein CsgG |
| *ompA* | 2949749..2950801 | 100 | 94.3 | outer membrane protein A |
| *entA* | 3342392..3343138 | 100 | 95.98 | 23-dihydro-23-dihydroxybenzoate dehydrogenase |
| *entB* | 3343138..3343995 | 100 | 97.44 | isochorismatase |
| *entE* | 3344009..3345619 | 100 | 95.9 | 23-dihydroxybenzoate-AMP ligase component of enterobactin synthase multienzyme complex |
| *entC* | 3345629..3346816 | 100 | 97.56 | isochorismate synthase 1 |
| *fepB* | 3347179..3348135 | 100 | 97.28 | ferrienterobactin ABC transporter periplasmic binding protein |
| *entS* | 3348139..3349389 | 100 | 95.52 | enterobactin exporter iron-regulated |
| *fepD* | 3349488..3350504 | 100 | 95.67 | ferrienterobactin ABC transporter permease |
| *fepG* | 3350501..3351493 | 100 | 94.56 | iron-enterobactin ABC transporter permease |
| *fepC* | 3351490..3352305 | 100 | 96.94 | ferrienterobactin ABC transporter ATPase |
| *entF* | 3353679..3357532 | 99.28 | 95.61 | enterobactin synthase multienzyme complex component ATP-dependent |
| *fes* | 3357750..3358952 | 100 | 96.76 | enterobactin/ferric enterobactin esterase |
| *fepA* | 3359195..3361435 | 100 | 96.74 | ferrienterobactin outer membrane transporter |
| *entD* | 3361460..3362230 | 100 | 94.03 | phosphopantetheinyl transferase component of enterobactin synthase multienzyme complex |
| *fdeC* | 3688250..3692491 | 99.76 | 92.35 | adhesin FdeC |
| *ykgK/ecpR* | 3695511..3696101 | 100 | 97.63 | regulator protein EcpR |
| *yagY/ecpB* | 3696601..3697269 | 100 | 98.66 | E. coli common pilus chaperone EcpB |
| *yagX/ecpC* | 3697295..3699820 | 100 | 98.65 | E. coli common pilus usher EcpC |
| *yagW/ecpD* | 3699810..3701453 | 100 | 98.6 | polymerized tip adhesin of ECP fibers |
| *yagV/ecpE* | 3701377..3702130 | 99.74 | 96.68 | E. coli common pilus chaperone EcpE |
| *espX1* | 3990645..3992066 | 100 | 94.37 | Type III secretion system effector EspX1 |
| *fimH* | 4088566..4089477 | 100 | 97.59 | FimH protein precursor |
| *fimG* | 4089488..4089991 | 100 | 98.21 | FimG protein precursor |
| *fimF* | 4090004..4090537 | 100 | 99.06 | FimF protein precursor |
| *fimD* | 4090544..4093180 | 100 | 98.82 | Outer membrane usher protein fimD precursor |
| *fimC* | 4093247..4093972 | 100 | 99.17 | Chaperone protein fimC precursor |
| *fimI* | 4094009..4094547 | 99.81 | 98.33 | Fimbrin-like protein fimI precursor |
| *fimA* | 4094612..4095217 | 100 | 95.55 | Type-1 fimbrial protein A chain precursor |
| *fimE* | 4095642..4096238 | 100 | 98.49 | Type 1 fimbriae Regulatory protein fimE |
| *fimB* | 4096716..4097318 | 100 | 98.18 | Type 1 fimbriae Regulatory protein fimB |
| *espX5* | 4336510..4337802 | 100 | 95.59 | Type III secretion system effector EspX5 |
| pEC6622-2 | *iroB* | 49404..50566 | 99.91 | 98.37 | glucosyltransferase IroB |
| *iroC* | 50629..54366 | 100 | 99.22 | ATP binding cassette transporter |
| *iroD* | 54470..55699 | 100 | 99.11 | esterase |
| *iroE* | 55784..56740 | 100 | 99.37 | esterase |
| *iroN* | 56785..58962 | 100 | 99.13 | salmochelin receptor IroN |
